# Supplementary material
Source: PubMed Central journal article supplement (PMC5760362)
Supplement: NIHMS928717-supplement-Figure_S1-6-Table_S1-S3.pdf [file NIHMS928717-supplement-Figure_S1-6-Table_S1-S3.pdf]

1 **Mature B lymphocytes accelerate wound healing after acute and chronic diabetic skin**  
2 **lesions**

3  
4 Ruxandra F. Sîrbulescu, PhD<sup>1,2</sup>, Chloe K. Boehm<sup>1,3</sup>, Erin Soon<sup>1,4</sup>, Moses Q. Wilks, PhD<sup>2,5</sup>, Iulian  
5 Ilieș, PhD<sup>6</sup>, Hushan Yuan, PhD<sup>2,5</sup>, Benjamin Maxner<sup>1,7</sup>, Nicolas Chronos, MD<sup>1</sup>, Charalambos  
6 Kaittanis, PhD<sup>2,5</sup>, Marc D. Normandin, PhD<sup>2,5</sup>, Georges El Fakhri, PhD<sup>2,5</sup>, Dennis P. Orgill, MD,  
7 PhD<sup>8</sup>, Ann E. Sluder, PhD<sup>1</sup>, Mark C. Poznansky, MB, ChB, PhD<sup>1,2</sup>

8  
9 <sup>1</sup>Vaccine and Immunotherapy Center, Division of Infectious Diseases, Department of Medicine,  
10 Massachusetts General Hospital, Boston, Massachusetts, USA. <sup>2</sup>Harvard Medical School,  
11 Boston, Massachusetts, USA. <sup>3</sup>Tufts University, Medford, Massachusetts, USA. <sup>4</sup>Imperial  
12 College London, London, UK. <sup>5</sup>Gordon Center for Medical Imaging, Nuclear Medicine and  
13 Molecular Imaging, Radiology Department, Massachusetts General Hospital, Boston,  
14 Massachusetts, USA. <sup>6</sup>Healthcare Systems Engineering Institute, College of Engineering,  
15 Northeastern University, Boston, Massachusetts, USA. <sup>7</sup>Boston University, Boston,  
16 Massachusetts, USA. <sup>8</sup>Division of Plastic Surgery, Brigham and Women's Hospital, Boston,  
17 Massachusetts, USA.

18  
19  
20 Correspondence should be addressed to R.F.S. ([rsirbulescu@mgh.harvard.edu](mailto:rsirbulescu@mgh.harvard.edu)) or M.C.P.  
21 ([mpoznansky@mgh.harvard.edu](mailto:mpoznansky@mgh.harvard.edu)).

22  
23 **Supporting information**

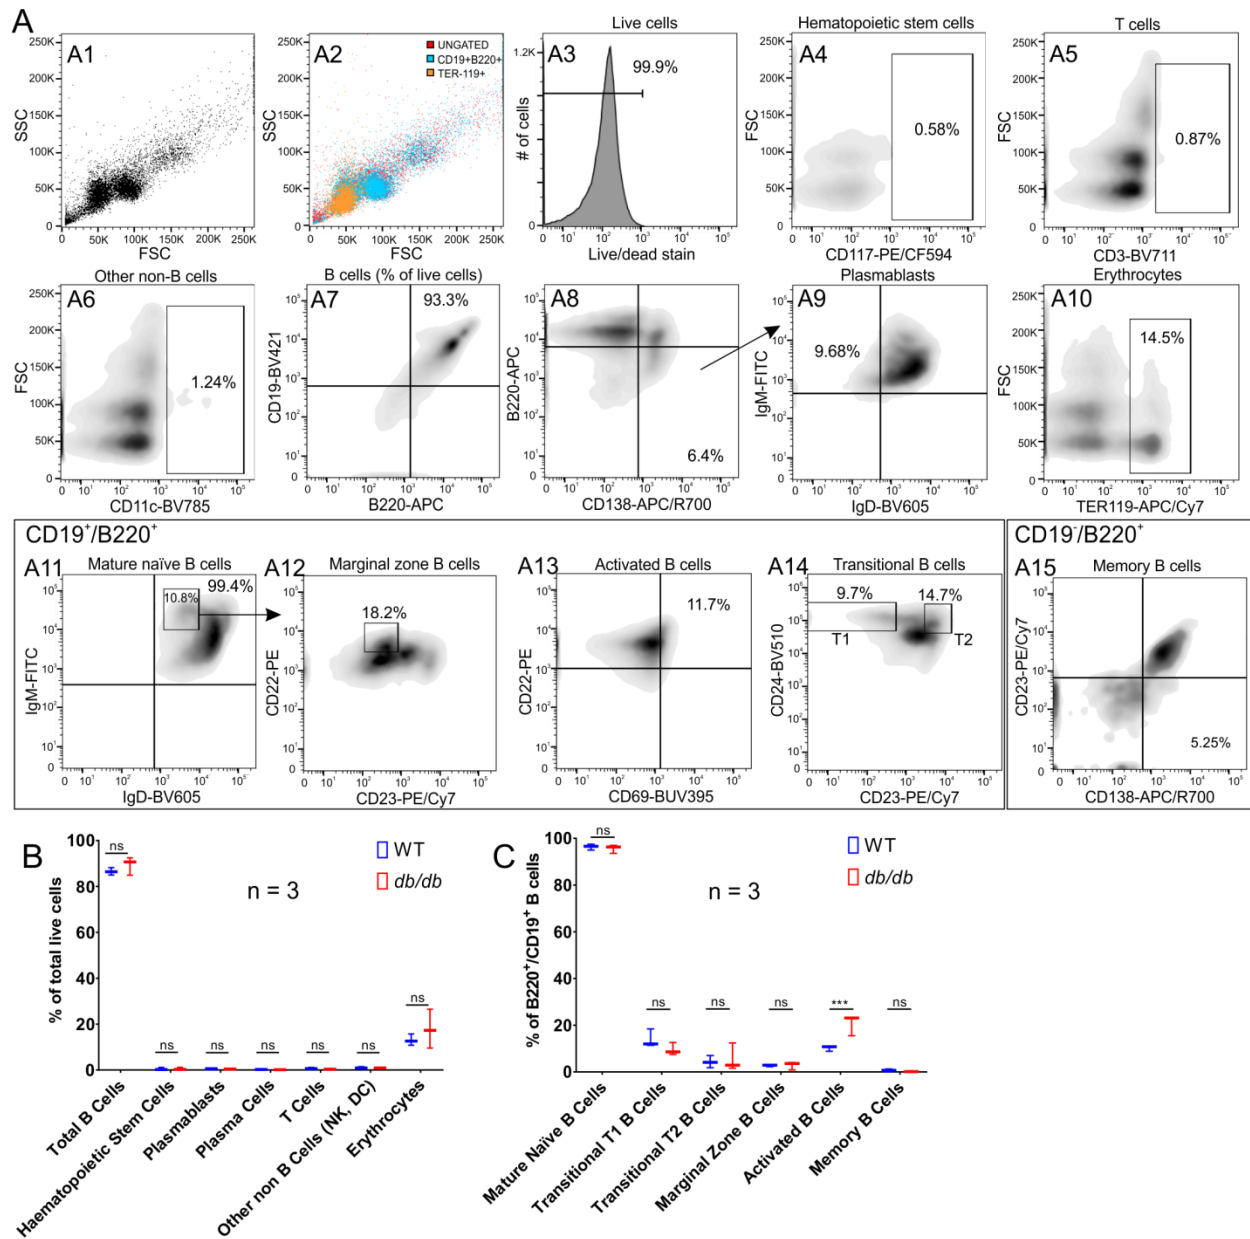

24

25 **Figure S1**

26 Flow cytometry characterization of the enriched B cell fraction applied to skin wounds. **A.**  
 27 Gating strategy for the various cell categories and B cell sub-populations included in the analysis  
 28 in a representative sample from WT animals. **A1:** Forward versus side scatter distribution of the  
 29 enriched B cell population. **A2:** Overlay of the forward versus side scatter distributions of  
 30 CD19<sup>+</sup>/B220<sup>+</sup> B cells (blue) and TER-119<sup>+</sup> erythrocytes, which represent the largest  
 31 contaminant (yellow) over all analyzed cells (red). **A3:** Live/dead stain indicated that the  
 32 majority of the cells were alive at the time of analysis. **A4-6:** The numbers of CD117<sup>+</sup>

33 hematopoietic stem cells, CD3<sup>+</sup> T cells, and other non-B cell contaminants (CD11c<sup>+</sup>) were  
34 practically non-detectable or present in trace numbers. Gating was performed independently,  
35 based on fluorescence-minus-one experiments for each of the analyzed markers. **A7**: In all  
36 samples, the majority of the isolated cells were CD19<sup>+</sup>/B220<sup>+</sup> B cells. **A8-9**: A relatively small  
37 percentage of the total cell count were plasmablasts or plasma cells. **A10**: The most significant  
38 contaminant in all samples was represented by red blood cells, as indicated by TER-119 labeling.  
39 **A11-15**: Gating strategy for B cell subtypes in the enriched B cell isolate. Mature naïve B cells  
40 represented the majority of the cells (**A11**), and included marginal zone B cells (**A12**) and  
41 transitional B cells (**A14**). Very low numbers of activated B cells or memory B cells were  
42 detected in the sample illustrated (**A13, 15**). **B**. Quantitative analysis in three independent  
43 experiments performed in triplicate indicated that there was no significant difference in the  
44 proportion of B cells or contaminants between samples isolated from WT or db/db mice (n = 3  
45 animals per genotype). **C**. Quantitative analysis showed that B cell subtypes were present in  
46 equal proportions in samples isolated from WT or db/db mice, with the exception of activated B  
47 cells, which were increased significantly in obese diabetic mice (n = 3 animals per genotype).

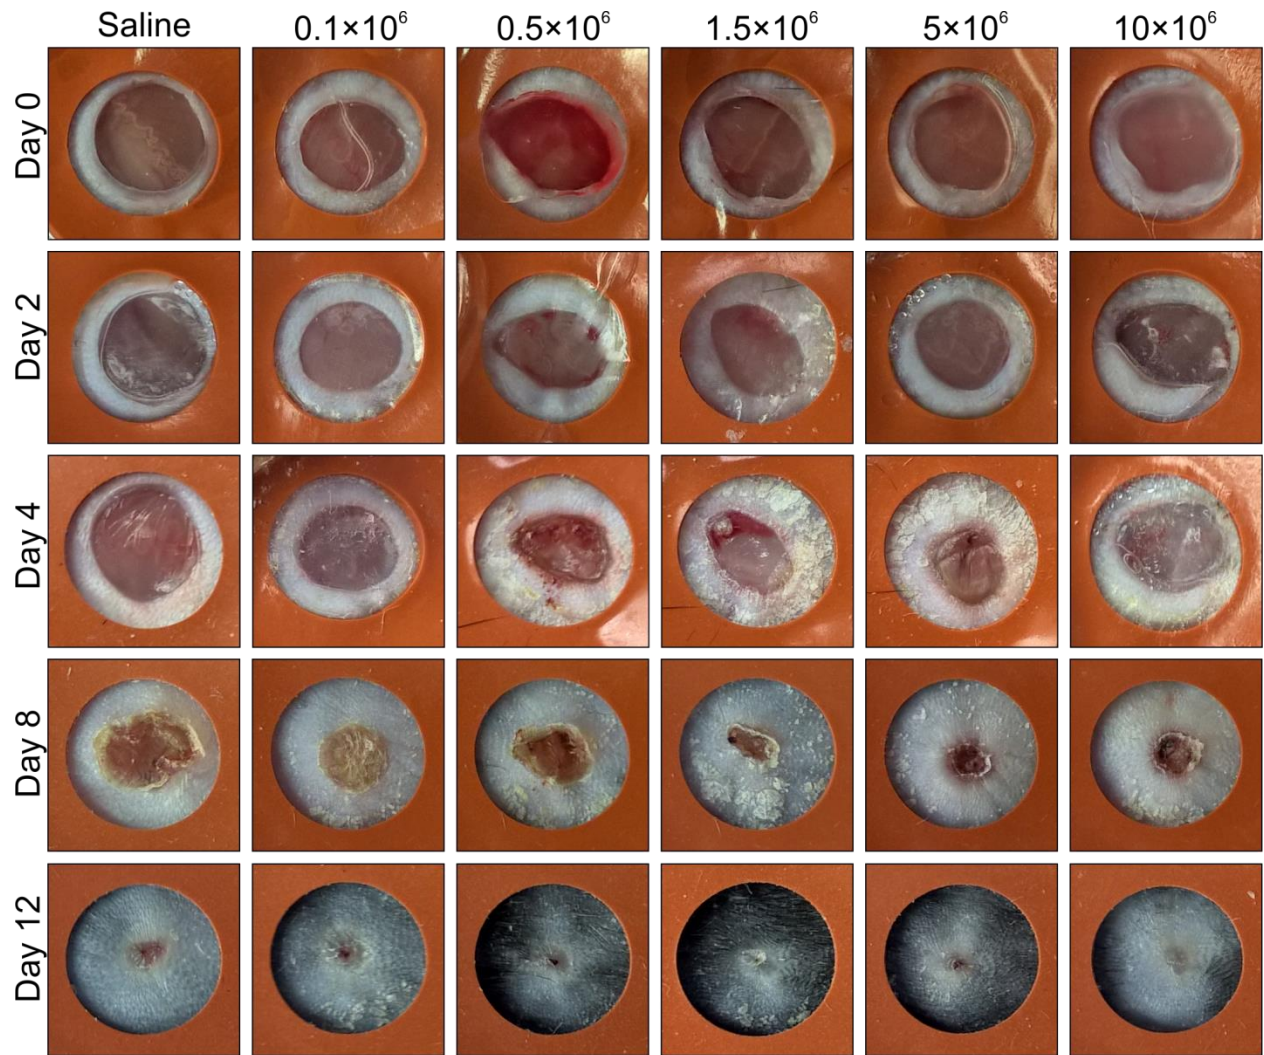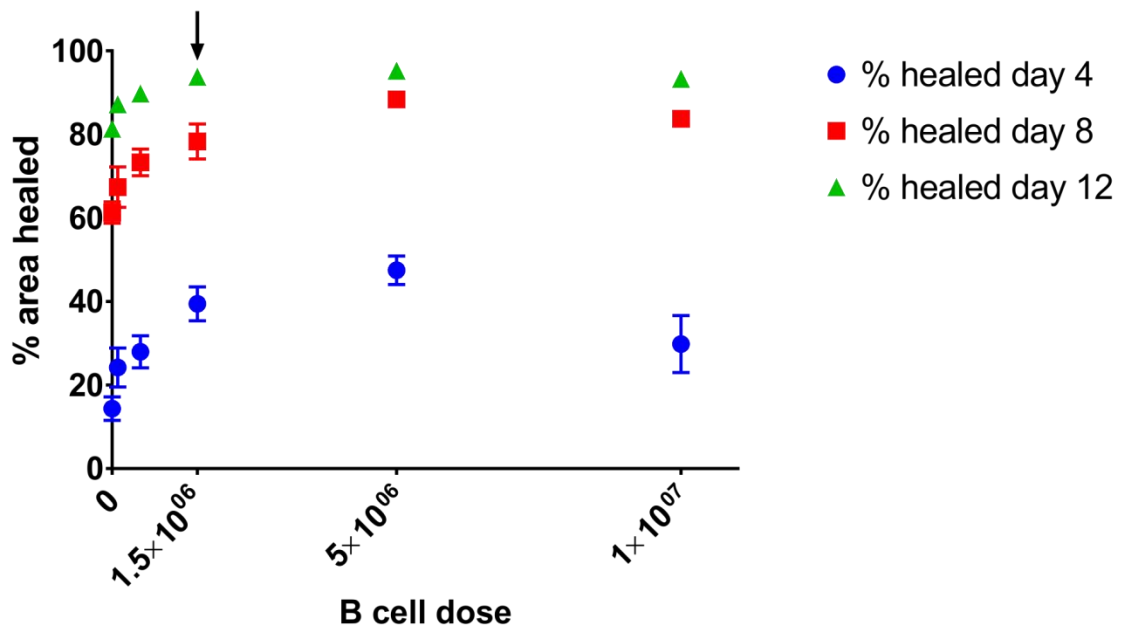

49 **Figure S2**

50 **B cells accelerate wound healing in a dose-dependent manner.** Applying B cells at different  
51 concentrations onto splinted full thickness excision lesions revealed a dose-dependent  
52 acceleration in the rate of wound closure. Increasing the amount of cells applied from 0 to 5  
53 million per wound led to a progressively accelerated closure of the treated wounds, with the first  
54 significant improvement in the rate of wound closure as compared to saline-treated baseline  
55 observed after the application of 1.5 million cells per wound (7.5 million cells/cm<sup>2</sup>). Further  
56 increasing the amount of applied cells to 10 million led to a slightly reduced efficacy as compared  
57 to the 1.5 and 5 million cell doses, in particular at day 4 post-injury, suggesting that the  
58 application of very high cell numbers may have detrimental effects. Interestingly, at later time  
59 points, wounds treated with the highest dose of 10 million cells performed as well as the 1.5 and  
60 5 million cell doses. It is likely that this reflects the dynamics of the in situ cell survival, because  
61 the number of viable B exogenous cells declines rapidly after day 6 (see Fig. 5E), effectively  
62 reducing the cell numbers. For each dosage, the same wound is shown at various time points.  
63 Inner diameter of the silicone splint = 7 mm. The graph summarizes the performance of each  
64 dosage at various time points after injury examined in the course of the study (n = 6 animals per  
65 dose). Overall, the dose-response curve for B cell treatment appeared to reach a plateau beyond  
66 1.5 million cells/wound. The latter dose was selected for subsequent wound healing experiments  
67 (arrow).

68

69

70

71

72

73

74

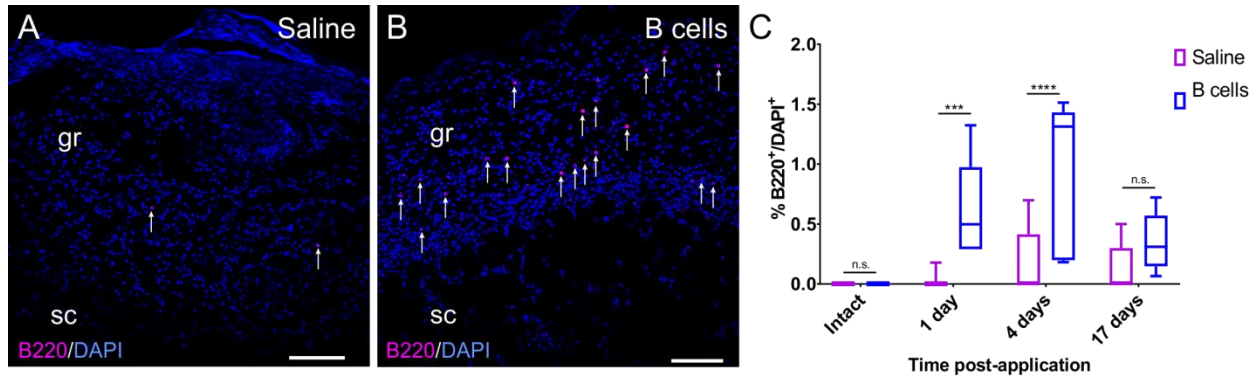

75

76 **Figure S3**

77 **Immunolabeling against CD45R/B220 allows the identification of B cells in transverse**

78 **sections through the wound bed. A. Very few B cells are normally present in the wound bed at**

79 **4 days post-injury in the granulation tissue (gr) or subcutaneous areas (sc) of the wound. Cell**

80 **nuclei are counterstained with DAPI. B. The exogenous application of B cells leads to greatly**

81 **increased numbers of B cells detectable in the wound bed 4 days after injury and treatment. Scale**

82 **bars, 100  $\mu$ m. C. Quantitative analysis of the B cell abundance in the wound bed and edges at**

83 **various time points post-application. Intact, uninjured skin was analyzed for comparison.**

84 **Significance was assessed using two-way ANOVA followed by Tukey's multiple comparisons**

85 **test. \*\*\*  $p < 0.001$ ; \*\*\*\*  $p < 0.0001$ .**



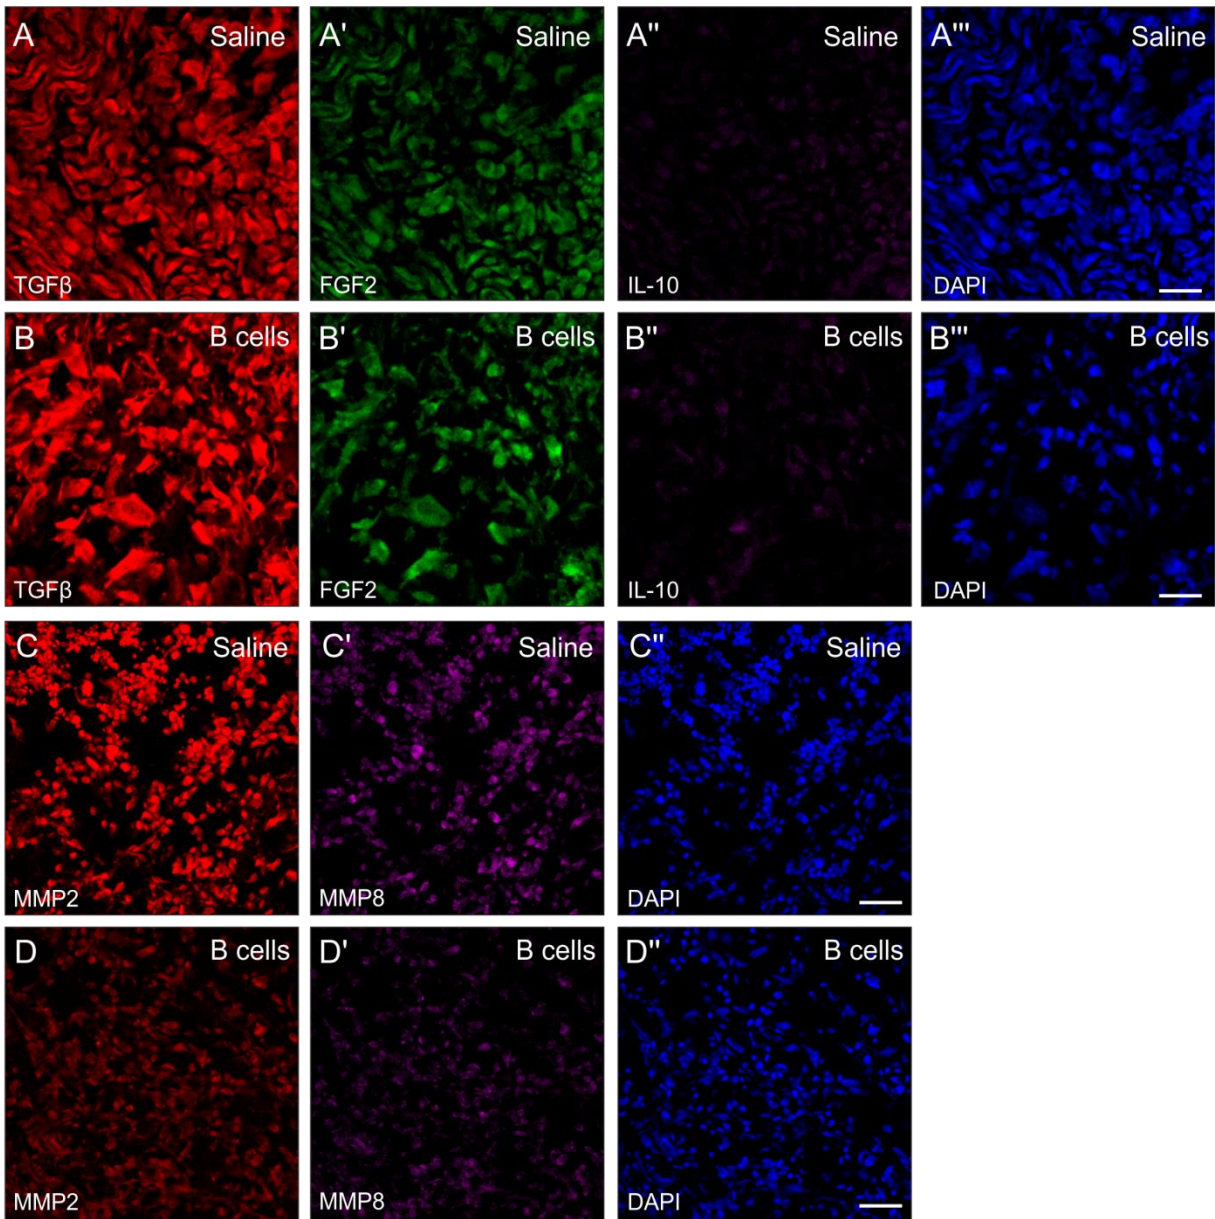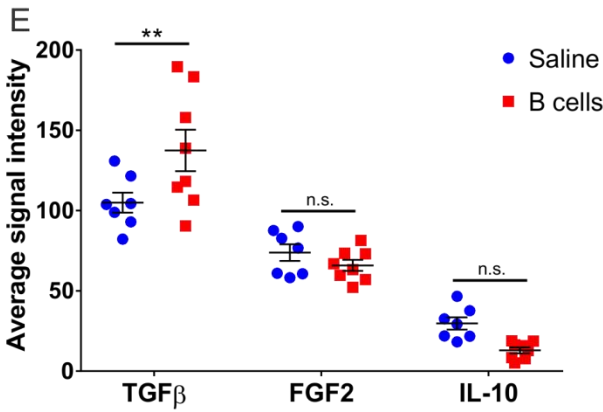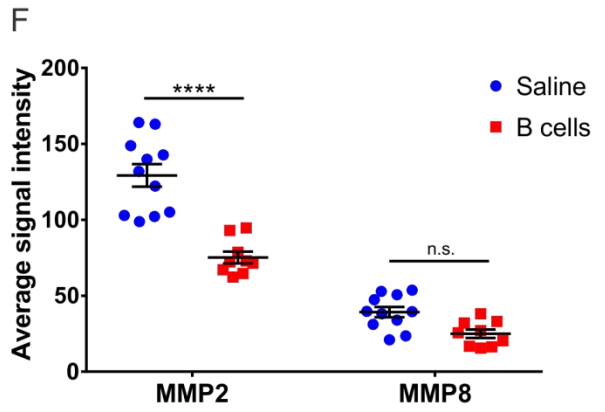

86

87

88 **Figure S4**

89 **B cell application alters the wound microenvironment. A-D''''**. Tissue sections collected from  
90 wound bed biopsies at 4 days post injury and treatment were immunostained for key growth  
91 factors (TGF- $\beta$ , FGF2) and anti-inflammatory cytokines (IL-10), as well as major proteolytic  
92 enzymes (MMP2, MMP8). Confocal images were collected in one session, using identical  
93 parameters. **E-F**. Quantification of average intensity of the staining within cells showed a  
94 significant increase in the expression of TGF- $\beta$  and a significant decrease in the expression of  
95 MMP2 in the granulation tissue of wounds that received B cell treatment at the time of injury.  
96 Statistical significance was assessed by two-way repeated-measures ANOVA, followed by  
97 Tukey's multiple comparisons test. \*\*  $p < 0.01$ ; \*\*\*\*  $p < 0.0001$ .



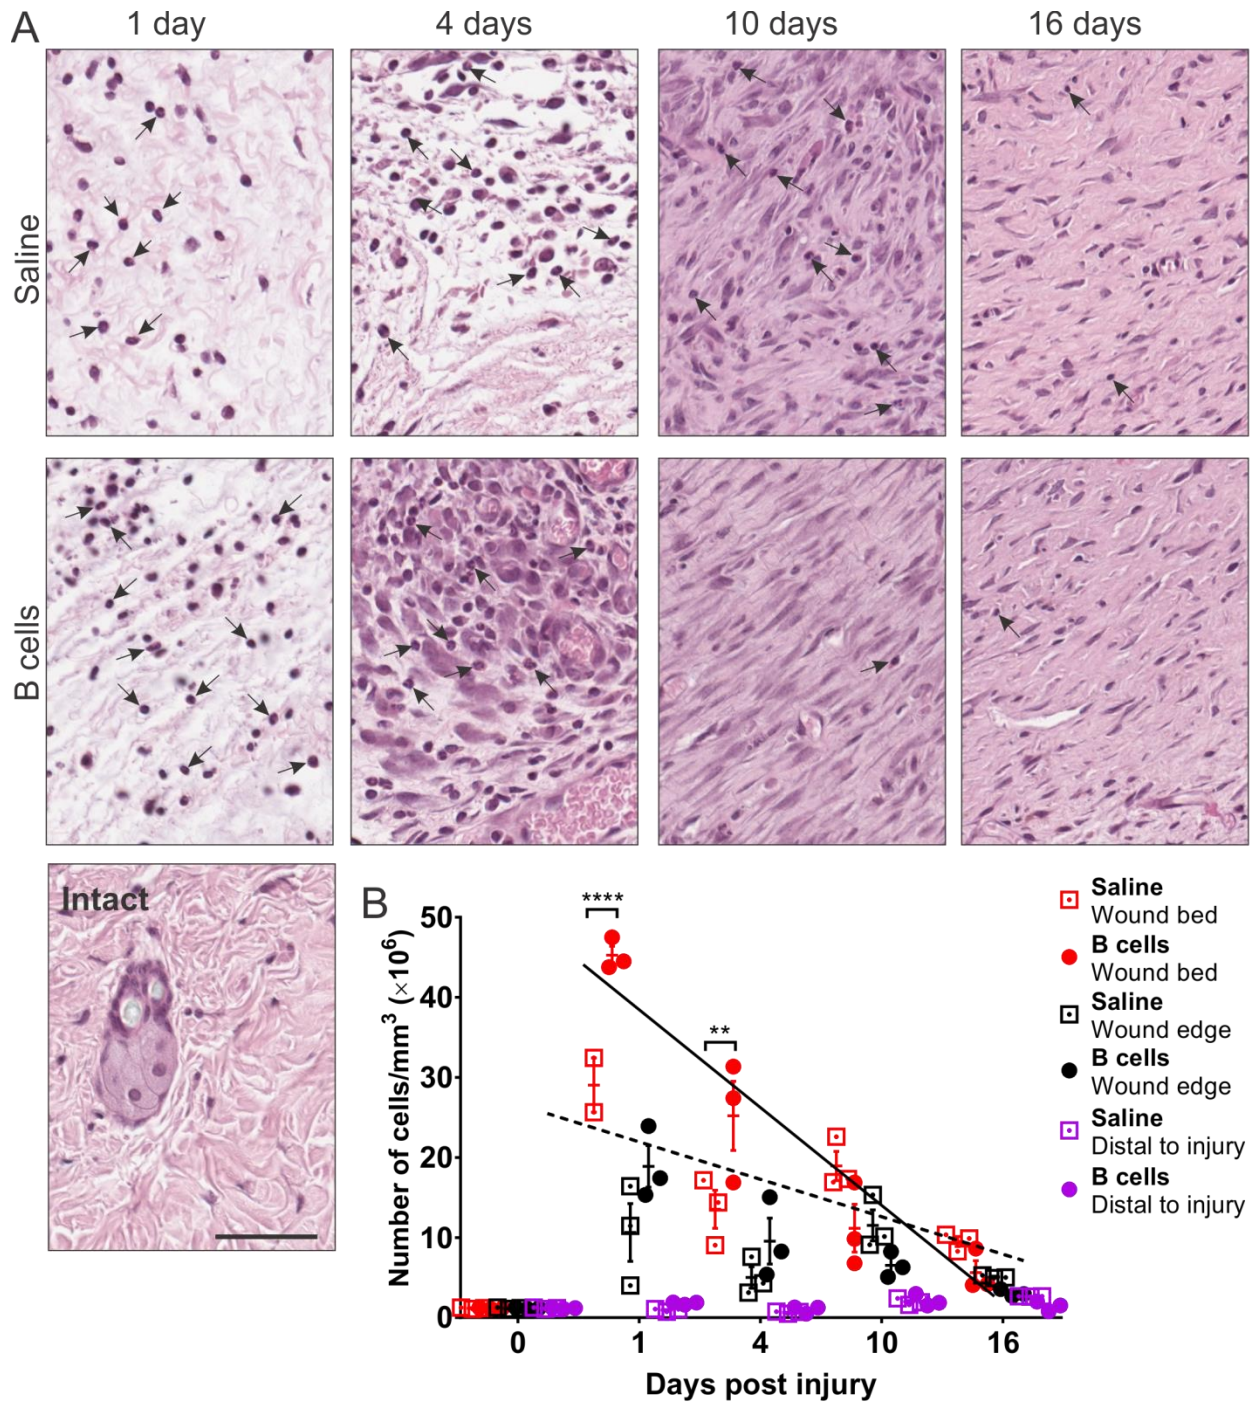

98

99

**Figure S5**

100 **B cells application alters the dynamics of neutrophil infiltration after injury. A.**  
 101 Hematoxylin and eosin staining of transverse sections through the wound bed in tissue biopsies  
 102 collected at various time points after injury. At early time points (1 day and 4 days), neutrophils  
 103 (arrows) infiltrate the wound bed in greater numbers in wounds treated acutely with B cells. By

104 contrast, at later time points (10 and 16 days), the granulation and scar tissue in the wounds  
105 treated acutely with B cells had overall fewer infiltrating neutrophils. Note the denser tissue and  
106 pronounced vascularization in the granulation tissue at 4 days and the scar tissue formation at 10  
107 days in B cell-treated wounds, suggesting accelerated progression of the wound healing. Scale  
108 bar, 50  $\mu\text{m}$ . **B.** Quantitative analysis of neutrophil infiltration in the wound bed, edges, and distal  
109 to the wound site. Neutrophils were present in very low numbers in intact tissue (0 time point) or  
110 at distal locations,  $>3$  mm away from the wound edge. In the wound bed, neutrophil infiltration  
111 was most pronounced at 1 day after injury, and it was significantly higher in B cell-treated  
112 wounds as compared to saline-treated controls. The numbers of infiltrating neutrophils decreased  
113 rapidly over time, moreso in B cell-treated wounds. While the regression line slope of the saline-  
114 treated controls (dashed line) was -5.3, in the B cell-treated wounds it reached -13.3 (continuous  
115 line), indicating a 2.5-fold increase in the rate of decay of cell numbers. Neutrophil infiltration  
116 into the wound edges followed a similar trend as the wound bed, with B cell-treated wounds  
117 showing a peak in cell numbers at 1 day post injury as compared to saline-treated wounds where  
118 the maximum cell infiltration was delayed until day 10 after injury.

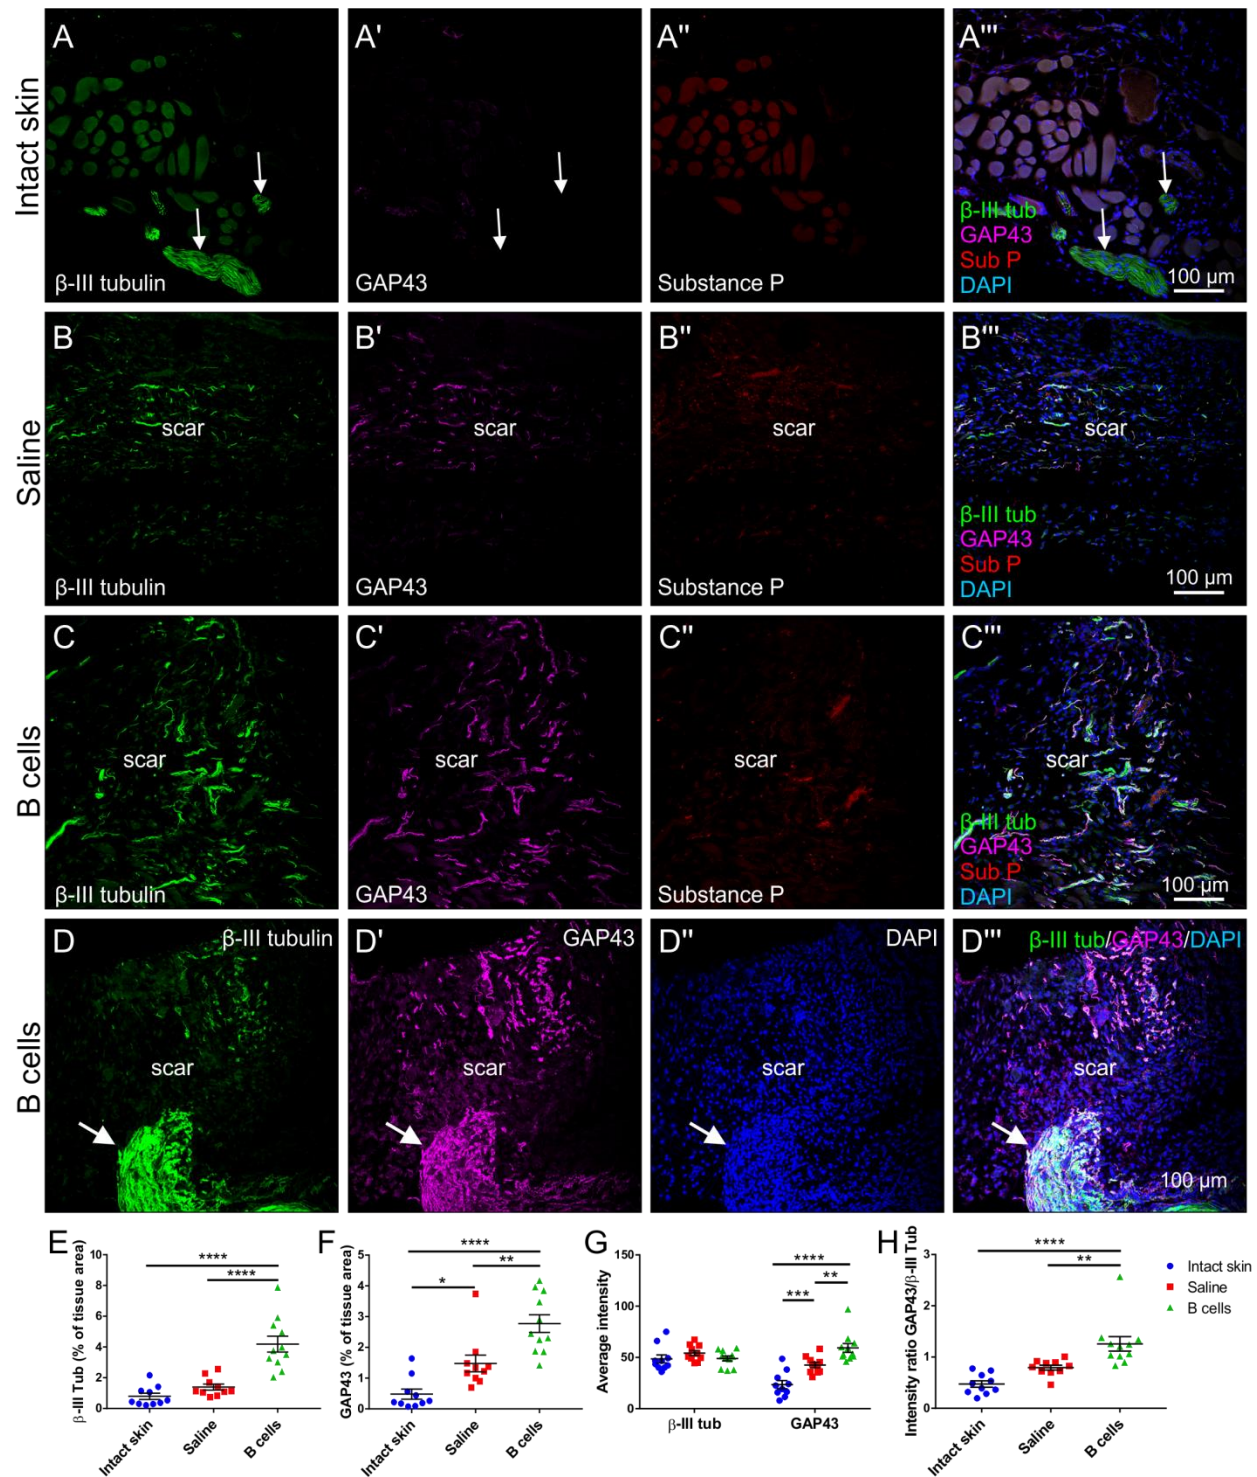

119

120 **Figure S6**

121 **B cell application at the time of injury is associated with increased regenerative capacity of**

122 **the nerve fibers in the scar tissue. A-A'''**. Confocal images of transverse sections through

123 intact skin tissue showing cutaneous nerves (arrows) immunolabeled against  $\beta$ -III tubulin, with

124 minimal expression of GAP43 or substance P. **B-B'''**. Similar immunolabeling in tissue sections  
125 collected from biopsies at 16 days post-injury in a saline treated (control) animal reveals  
126 innervation of the scar tissue. The newly growing nerve endings show GAP43 expression but  
127 lack substance P. **C-C'''**. In wounds that were treated with B cells at the time of injury,  
128 numerous nerve endings expressing both  $\beta$ -III tubulin and GAP43 but not substance P can be  
129 observed. **D-D'''**. Typical example of cutaneous nerve growth immediately under the scar tissue  
130 and numerous fine nerve endings invading the scar tissue in B cell-treated tissues. Note that  
131 GAP43 is strongly expressed even in the distant axons of the cutaneous nerve (arrow). Such  
132 instances were rarely observed in biopsies derived from saline-treated wounds. **E**. Replicating  
133 previous experiments, the area covered by  $\beta$ -III tubulin+ immunostaining was significantly  
134 increased in B cell treated wounds. **F**. The area covered by GAP43<sup>+</sup> fibers was significantly  
135 increased in tissues treated with B cells as compared to either saline-treated or intact control,  
136 while saline-treated wounds did show a significant increase in GAP43 immunolabeling as  
137 compared to uninjured tissue. **G**. The average intensity of the staining within all detected nerve  
138 endings was similar between experimental conditions for  $\beta$ -III tubulin, but showed significant  
139 differences for GAP43, with B cell-treated tissues showing the highest GAP43 immunolabeling  
140 intensity. **H**. The ratio of GAP43/  $\beta$ -III tubulin, which served as a measure of the regenerative  
141 capacity of axons, was significantly higher in B cell treated tissue as compared to either saline-  
142 treated wounds or intact tissue. Statistical significance was assessed by one-way ANOVA,  
143 followed by Tukey's multiple comparisons test. \*  $p < 0.05$ ; \*\*  $p < 0.01$ ; \*\*\*  $p < 0.001$ ; \*\*\*\*  $p <$   
144  $0.0001$ .

145

146

147

148

149

150

151

152 **Table S1: Characterization of the cellular composition of enriched B cell isolate from**  
 153 **spleen.**

| Cell type                         | Characteristic markers                               | WT spleen                           | db/db spleen                        |
|-----------------------------------|------------------------------------------------------|-------------------------------------|-------------------------------------|
|                                   |                                                      | (average % of total ± SEM)<br>n = 3 | (average % of total ± SEM)<br>n = 3 |
| <b>B cells</b>                    | B220 <sup>+</sup> CD19 <sup>+</sup>                  | 86.5 ± 0.93                         | 89.4 ± 2.29                         |
| <b>Hematopoietic stem cells</b>   | CD117 <sup>+</sup>                                   | 0.48 ± 0.34                         | 0.51 ± 0.32                         |
| <b>Plasmablasts</b>               | B220 <sup>low</sup> CD138 <sup>+</sup>               | 0.62 ± 0.10                         | 0.39 ± 0.10                         |
| <b>Plasma cells</b>               | B220 <sup>-</sup> CD138 <sup>+</sup>                 | 0.22 ± 0.04                         | 0.11 ± 0.03                         |
| <b>T cells</b>                    | CD3 <sup>+</sup> B220 <sup>-</sup> CD19 <sup>-</sup> | 0.71 ± 0.21                         | 0.37 ± 0.04                         |
| <b>Other non-B cells (NK, DC)</b> | CD11c <sup>+</sup>                                   | 1.05 ± 0.20                         | 0.89 ± 0.10                         |
| <b>Erythrocytes</b>               | TER-119 <sup>+</sup>                                 | 13.0 ± 1.43                         | 17.8 ± 4.89                         |

154

155

156

157

158

159

160

161



162 **Table S2: Characterization of the B cell subpopulations in the enriched isolate applied to**  
 163 **wounds.**

| B cell subtype                 | Characteristic markers<br>(gated on B220 <sup>+</sup> /CD19 <sup>+</sup> )    | WT spleen                                                                      | db/db spleen                                                                   |
|--------------------------------|-------------------------------------------------------------------------------|--------------------------------------------------------------------------------|--------------------------------------------------------------------------------|
|                                |                                                                               | (average % of<br>B220 <sup>+</sup> /CD19 <sup>+</sup> cells<br>± SEM)<br>n = 3 | (average % of<br>B220 <sup>+</sup> /CD19 <sup>+</sup> cells<br>± SEM)<br>n = 3 |
| <b>Mature Naïve B Cells</b>    | IgM <sup>+</sup> IgD <sup>+</sup>                                             | 96.4 ± 0.73                                                                    | 95.6 ± 1.04                                                                    |
| <b>Transitional T1 B Cells</b> | IgM <sup>+</sup> IgD <sup>+</sup> CD24 <sup>+</sup> CD23 <sup>-</sup>         | 13.93 ± 2.24                                                                   | 9.57 ± 1.55                                                                    |
| <b>Transitional T2 B Cells</b> | IgM <sup>+</sup> IgD <sup>+</sup> CD24 <sup>+</sup> CD23 <sup>high</sup>      | 4.31 ± 1.50                                                                    | 5.62 ± 3.41                                                                    |
| <b>Marginal Zone B Cells</b>   | IgM <sup>high</sup> IgD <sup>low</sup> CD22 <sup>high</sup> CD23 <sup>-</sup> | 2.73 ± 0.25                                                                    | 2.84 ± 0.98                                                                    |
| <b>Activated B Cells</b>       | CD69 <sup>+</sup>                                                             | 10.18 ± 0.66                                                                   | 20.6 ± 2.55                                                                    |
| <b>Memory B Cells</b>          | CD138 <sup>+</sup> CD23 <sup>-</sup>                                          | 0.68 ± 0.36                                                                    | 0.19 ± 0.12                                                                    |

164

165

166

167

168

169

170

171



172 **Table S3: Wound scoring criteria and range.**

| Parameter                                          | Score                                                                      |                                                                                       |                                                                             |                                              |
|----------------------------------------------------|----------------------------------------------------------------------------|---------------------------------------------------------------------------------------|-----------------------------------------------------------------------------|----------------------------------------------|
|                                                    | 1                                                                          | 2                                                                                     | 3                                                                           | 4                                            |
| <b>Presence of granulation tissue</b>              | Abundant                                                                   | Moderate                                                                              | Low                                                                         | Absent                                       |
| <b>Collagen fiber orientation</b>                  | Vertical                                                                   | Mixed                                                                                 | Horizontal                                                                  | -                                            |
| <b>Maturity of collagen</b>                        | Mostly immature (%B/RGB <40%)                                              | Intermediate (%B/RGB= 40-50%)                                                         | Mostly mature (%B/RGB >50%)                                                 | -                                            |
| <b>Pattern of collagen deposition</b>              | Densely packed fascicles                                                   | Mixed fascicle and reticular                                                          | Reticular                                                                   | -                                            |
| <b>Angiogenesis</b>                                | Absent                                                                     | Low (1-9 capillaries/ 500 $\mu\text{m}^2$ )                                           | Moderate (10-15 capillaries/ 500 $\mu\text{m}^2$ )                          | High (>15 capillaries/ 500 $\mu\text{m}^2$ ) |
| <b>Thickness of regenerated tissue</b>             | Thin (<500 $\mu\text{m}$ in WT)<br>(<100 $\mu\text{m}$ in <i>db/db</i> )   | Moderate (500-1000 $\mu\text{m}$ in WT)<br>(100-200 $\mu\text{m}$ in <i>db/db</i> )   | Thick (>1000 $\mu\text{m}$ in WT)<br>(>200 $\mu\text{m}$ in <i>db/db</i> )  | -                                            |
| <b>Width of scar</b>                               | Wide (>1000 $\mu\text{m}$ in WT)<br>(>2000 $\mu\text{m}$ in <i>db/db</i> ) | Moderate (600-1000 $\mu\text{m}$ in WT)<br>(1500-2000 $\mu\text{m}$ in <i>db/db</i> ) | Narrow (<600 $\mu\text{m}$ in WT)<br>(<1500 $\mu\text{m}$ in <i>db/db</i> ) | -                                            |
| <b>Regenerated structures (e.g. nerve endings)</b> | Absent                                                                     | Present                                                                               | -                                                                           | -                                            |

173
